# Supplementary material
Source: PubMed Central journal article supplement (PMC11029267)
Supplement: 262_2013_1447_MOESM1_ESM.pdf [file 262_2013_1447_MOESM1_ESM.pdf]

**Supplemental Table 1.** Characteristics of patients and healthy donors

| <b>Clinical<br/>Diagnosis</b> | <b>No. of<br/>Patients</b> | <b>Sex M/F</b> | <b>ALT (IU/L)</b> | <b>Etiology<br/>(HCV/HBV/others)</b> | <b>AFP (ng/ml)</b> | <b>Child-Pugh<br/>(A/B/C)</b> | <b>Tumor Size<br/>(large/small)</b> | <b>Tumor Multiplicity<br/>(multiple/solitary)</b> | <b>TNM Stage<br/>(I/II/III/IV)</b> |
|-------------------------------|----------------------------|----------------|-------------------|--------------------------------------|--------------------|-------------------------------|-------------------------------------|---------------------------------------------------|------------------------------------|
| HCC patients                  | 123                        | 83/40          | 52 ± 36           | 82/22/19                             | 1051 ± 4391        | 84/33/6                       | 69/54                               | 69/54                                             | 32/45/35/11                        |
| CLD patients                  | 26                         | 14/12          | 46 ± 27           | 22/4/0                               | 11 ± 7             | 26/0/0                        | ND                                  | ND                                                | ND                                 |
| Healthy donors                | 13                         | 8/5            | 17 ± 5            | ND                                   | ND                 | ND                            | ND                                  | ND                                                | ND                                 |

Abbreviations: ALT, alanine aminotransferase; HCV, hepatitis C virus; HBV hepatitis B virus; AFP, Alpha-fetoprotein; HCC, hepatocellular carcinoma; CLD, chronic liver disease;

SD, standard deviation

All continuous variables were expressed as mean ± SD.

**Supplemental Table 2. Serum cytokines and CD4<sup>+</sup> CD25<sup>+</sup> CD127<sup>-/low</sup> Tregs**

| Cytokine   | Healthy donor<br>(mean)<br>(n=13) | Treg ≥7 %<br>(mean)<br>(n=29) | Range        | Treg <7%<br>(mean)<br>(n=23) | Range       | p value |
|------------|-----------------------------------|-------------------------------|--------------|------------------------------|-------------|---------|
| IL-1ra     | 34.2                              | 54.2                          | (11.0-430)   | 79.7                         | (5.9-600)   | 0.383   |
| IL-2       | 10.5                              | 26.0                          | (2.1-54.3)   | 16.0                         | (0.9-50.6)  | 0.167   |
| IL-4       | 2.6                               | 6.17                          | (1.47-11.9)  | 4.54                         | (0.71-10.9) | 0.128   |
| IL-6       | 9.9                               | 14.6                          | (0.2-97.2)   | 15.1                         | (1.6-130)   | 0.872   |
| IL-8       | 24.5                              | 49.5                          | (6.2-291)    | 40.1                         | (10.9-256)  | 0.563   |
| IL-10      | 2.76                              | 4.99                          | (0.6-12.1)   | 2.97                         | (0.1-10.4)  | 0.030   |
| IL-12(p70) | 14.6                              | 25.8                          | (0.6-140)    | 23.2                         | (2.8-78)    | 0.715   |
| IL-13      | 7.6                               | 11.6                          | (2.7-33.6)   | 8.8                          | (1.2-22.9)  | 0.167   |
| IL-17      | 15.7                              | 20.1                          | (4.2-70)     | 25.4                         | (2.1-119)   | 0.340   |
| Eotaxin    | 104                               | 132                           | (59.0-493)   | 119                          | (26.3-245)  | 0.906   |
| G-CSF      | 7.9                               | 11.2                          | (2.7-41.3)   | 10.1                         | (0.5-33.7)  | 0.424   |
| IFN-γ      | 52.6                              | 85.9                          | (23.1-417)   | 78.6                         | (2.5-343)   | 0.319   |
| MCP-1      | 20.2                              | 27.2                          | (3.5-114)    | 21.9                         | (8.4-71)    | 0.375   |
| MIP-1b     | 97.6                              | 123                           | (56.6-490)   | 103                          | (39.7-229)  | 0.696   |
| PDGF       | 4012                              | 4179                          | (1271-10136) | 4305                         | (831-13557) | 0.815   |
| RANTES     | 2978                              | 3041                          | (1040-4714)  | 3097                         | (599-6165)  | 0.598   |
| TNF-α      | 10.5                              | 29.1                          | (0.1-175)    | 32.7                         | (2.9-155)   | 0.747   |
| VEGF       | 34.6                              | 83.4                          | (24.5-371)   | 71.9                         | (9.3-224)   | 0.538   |

Abbreviations: IL, interleukin; G-CSF, granulocytic colony stimulating factor; IFN, interferon; MCP, monocyte chemoattractant protein; MIP, macrophage inflammatory protein; PDGF, platelet-derived growth factor; RANTES, regulated upon activation, normal T cell-expressed and secreted; TNF, tumor necrosis factor; VEGF, vascular endothelial growth factor

Mann-Whitney's U test was used for univariate analysis of two groups that were classified according to the frequency of MDSCs.

**Supplemental table 3.** The clinical parameters before RFA

| Clinical characteristics                  | MDSC ratio $\geq 22$ | MDSC ratio $< 22$ | p value |
|-------------------------------------------|----------------------|-------------------|---------|
|                                           | (n=8)                | (n=25)            |         |
| Pre MDSC ratio (%)                        | 28.7                 | 14.8              | 0.004   |
| Post MDSC ratio (%)                       | 30.2                 | 10.8              | <0.001  |
| Sex (M/F)                                 | 6/2                  | 13/12             | 0.252   |
| Prothrombin time (%)                      | 82.8                 | 79.9              | 0.663   |
| Serum albmin (g/dl)                       | 3.70                 | 3.67              | 0.794   |
| Total bilirubin                           | 0.83                 | 1.03              | 0.408   |
| Platelet ( $10^4/\mu\text{l}$ )           | 8.6                  | 9.5               | 0.473   |
| Type IV collagen 7S (ng/ml)               | 7.5                  | 7.6               | 0.924   |
| AFP (ng/ml)                               | 146                  | 41.7              | 0.214   |
| Pre neutrophil/lymphocyte                 | 1.98                 | 2.19              | 0.486   |
| Post neutrophil/lymphocyte                | 2.70                 | 2.16              | 0.097   |
| Pre ALT (IU/l)                            | 45.0                 | 55.3              | 0.421   |
| Post ALT (IU/l)                           | 42.6                 | 52.2              | 0.584   |
| Child-Pugh (A/B/C)                        | 7/1/0                | 20/5/0            | 0.632   |
| Tumor Size (mm)                           | 21.8                 | 18.2              | 0.313   |
| Tumor Multiplicity<br>(multiple/solitary) | 6/2                  | 13/12             | 0.252   |

Abbreviations: AFP, Alpha-fetoprotein; ALT, alanine aminotransferase

**A** CD15<sup>+</sup> CD14<sup>-</sup> CD11b<sup>+</sup> CD33<sup>+</sup> cells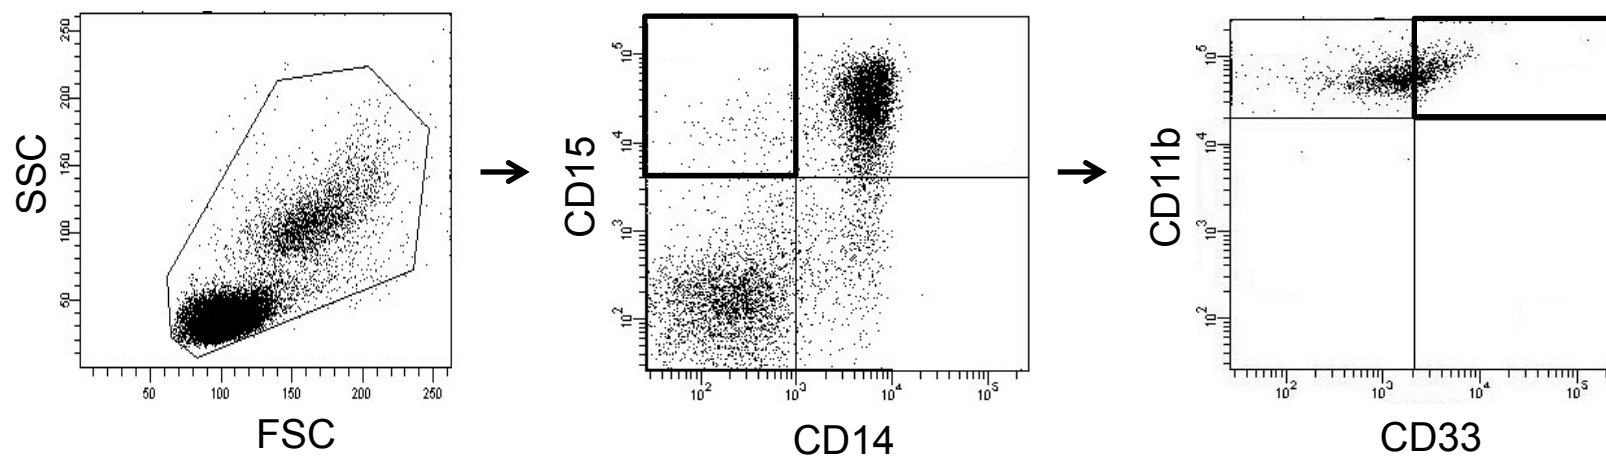**B** CD15<sup>+</sup> CD14<sup>-</sup> CD11b<sup>+</sup> CD33<sup>+</sup> cells / PBMCs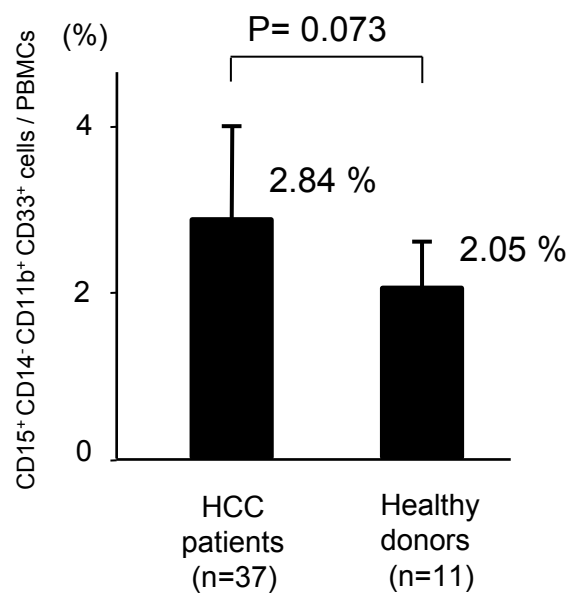**C** CD15<sup>+</sup> CD14<sup>-</sup> CD11b<sup>+</sup> CD33<sup>+</sup> cells / PBMCs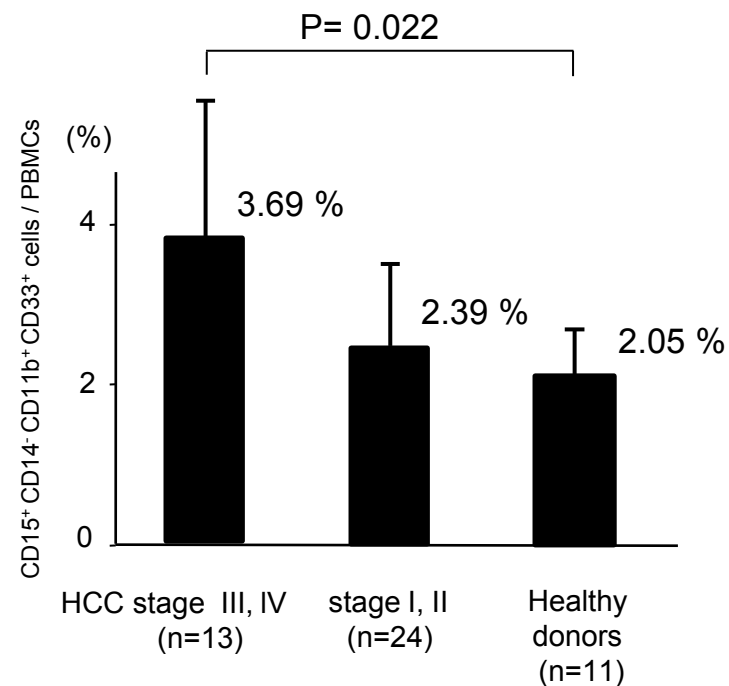

**A** CD4<sup>+</sup> CD25<sup>+</sup> CD127<sup>-/low</sup> Tregs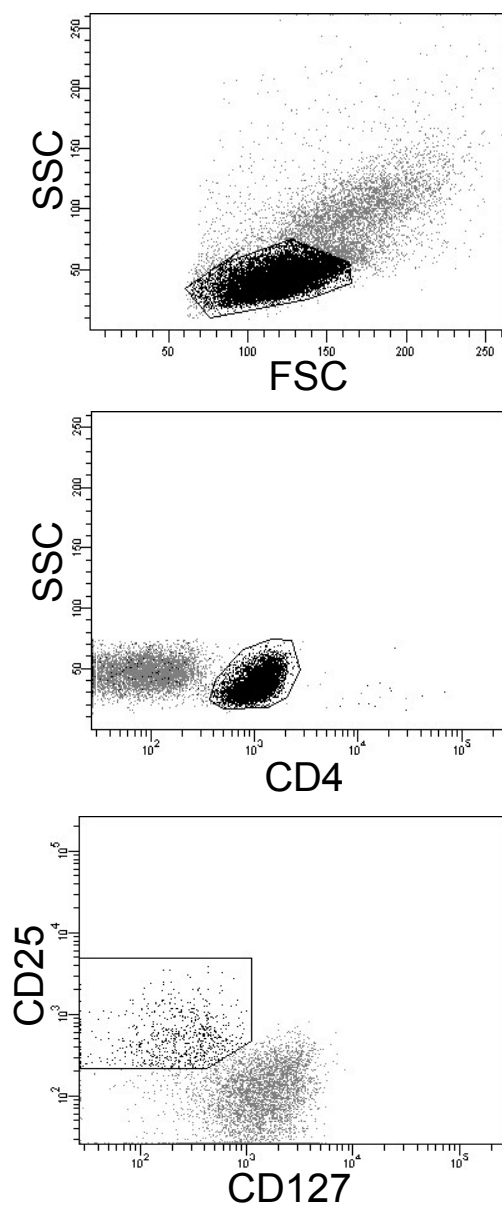**B** Tregs / CD4<sup>+</sup> cells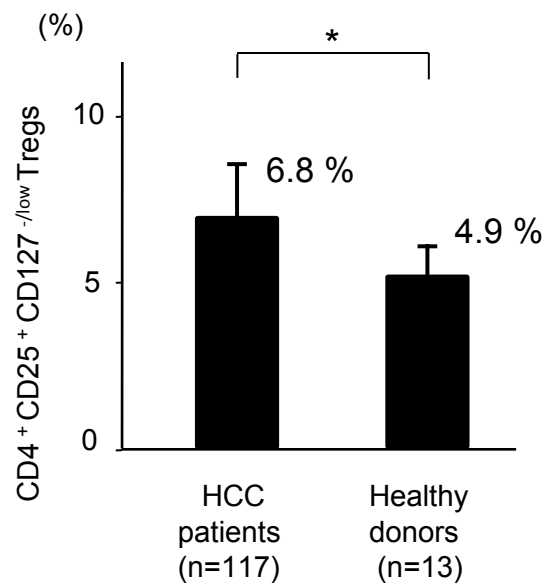**C** Tregs / CD4<sup>+</sup> cells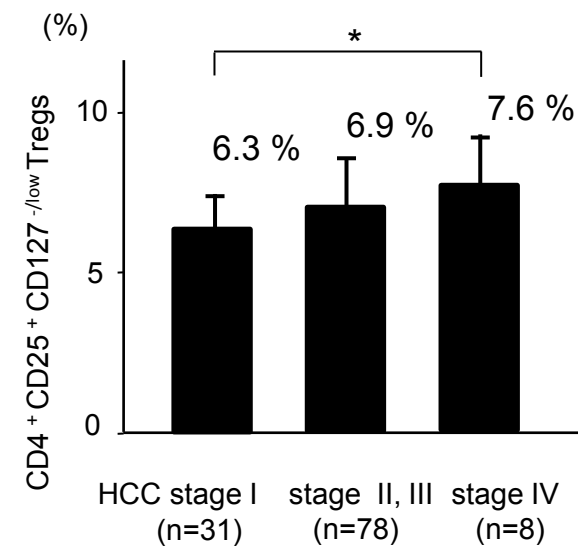**D**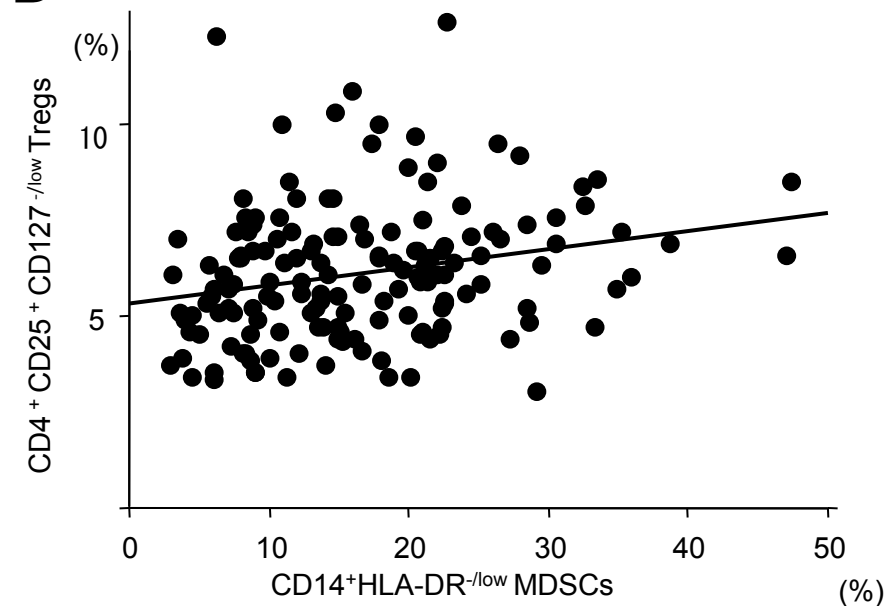

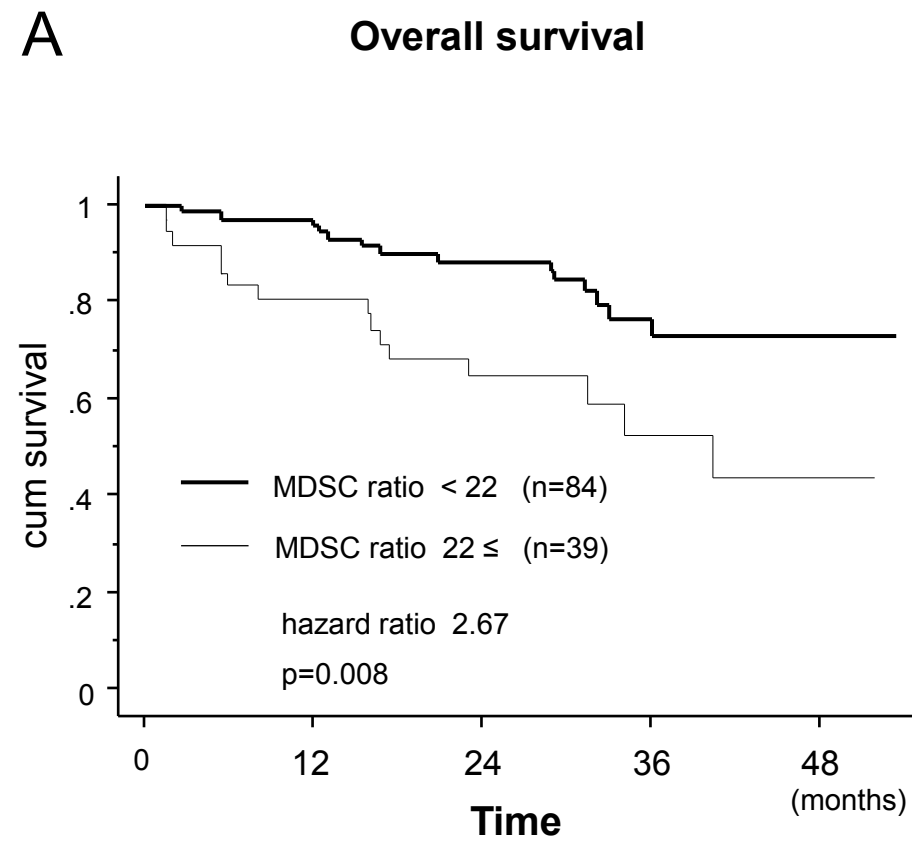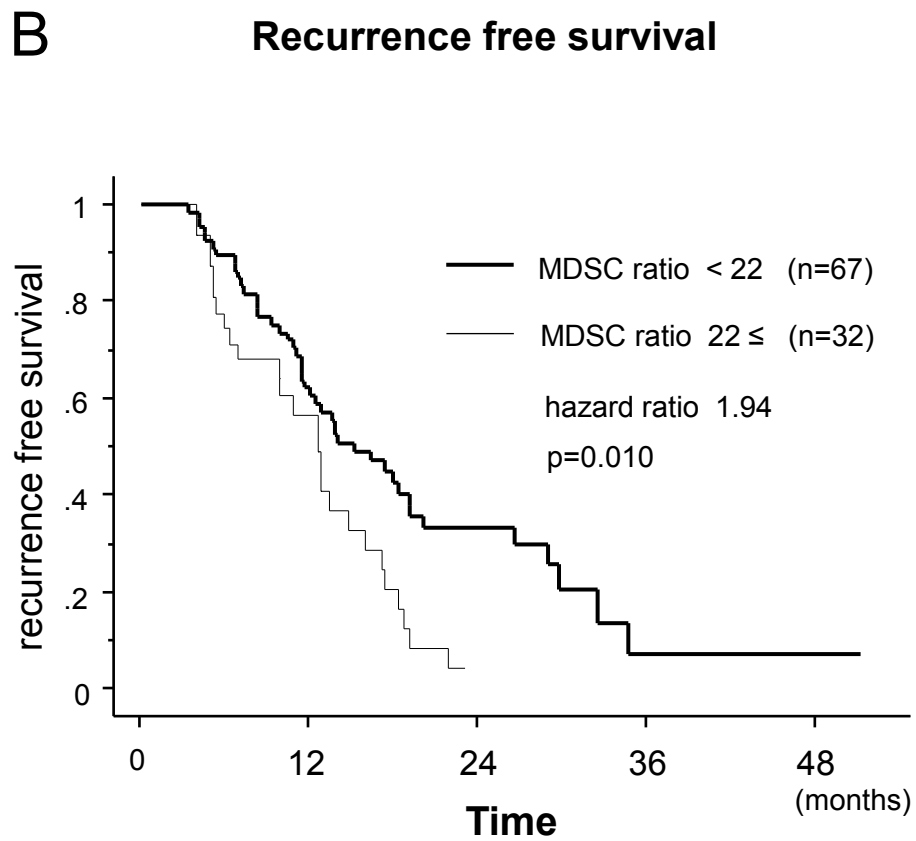

Suppl. figure 1: (A) Gating strategy of CD15<sup>+</sup>CD14<sup>-</sup>CD11b<sup>+</sup>CD33<sup>+</sup> cells (B) The frequency of CD15<sup>+</sup>CD14<sup>-</sup>CD11b<sup>+</sup>CD33<sup>+</sup> cells in PBMCs was higher in HCC patients than healthy donors (2.84% vs. 2.06%,  $p = 0.073$ ). (C) The frequency of CD15<sup>+</sup>CD14<sup>-</sup>CD11b<sup>+</sup>CD33<sup>+</sup> cells was correlated with tumor progression (stage III and IV: 3.69% (n=13) vs. stage I and II: 2.39% (n=24),  $p = 0.022$ ).

Suppl. Figure 2: (A) Gating strategy of CD4<sup>+</sup> CD25<sup>+</sup> CD127<sup>-/low</sup> Tregs (B) The frequency of CD4<sup>+</sup> CD25<sup>+</sup> CD127<sup>-/low</sup> Tregs was significantly increased in HCC patients than healthy donors (\*,  $p < 0.01$ ). (C) The frequency of Tregs was correlated with tumor progression. (D) There was only a weak correlation between the frequencies of CD14<sup>+</sup>HLA-DR<sup>-/low</sup> MDSCs and CD4<sup>+</sup> CD25<sup>+</sup> CD127<sup>-/low</sup> Tregs ( $r = 0.24$ ).

Suppl. figure 3: (A) Kaplan-Meier curve for overall survival in our cohort. (B) Kaplan-Meier curve for recurrence free survival in our cohort.
